# Supplementary figures and images for: Local online learning in recurrent networks with random feedback
Source: eLife journal article supplement (doi:10.7554/elife.43299), 2019-05-24

**a** $T = 20\tau$ 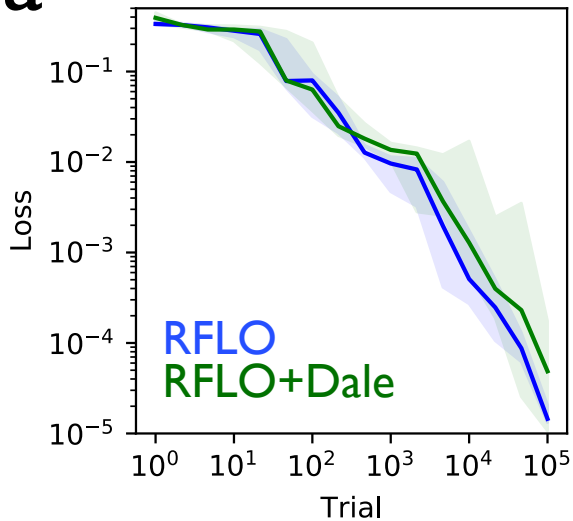 $T = 160\tau$ 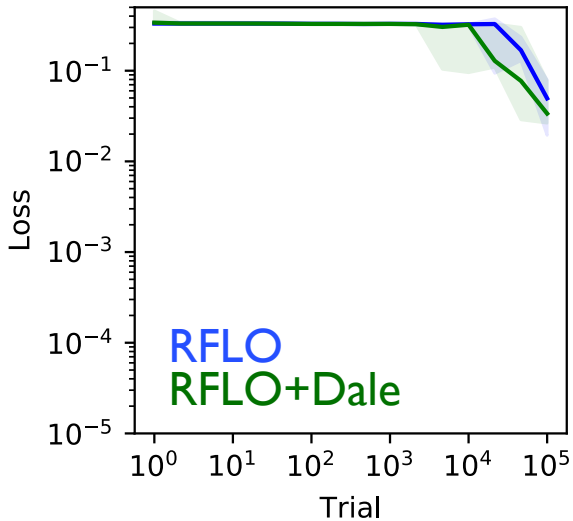**b**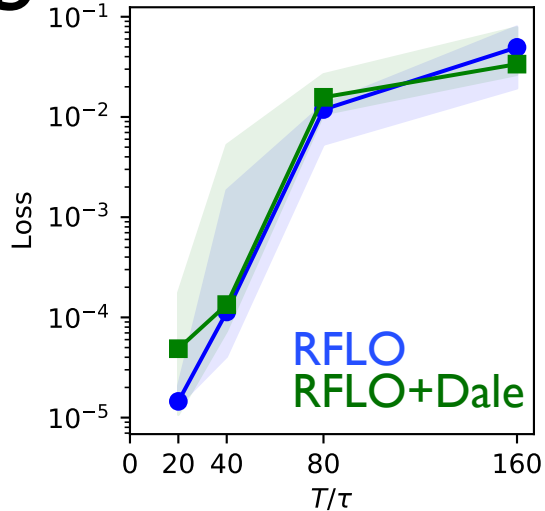

Supplement: supp [file elife-43299-supp-v1.zip]

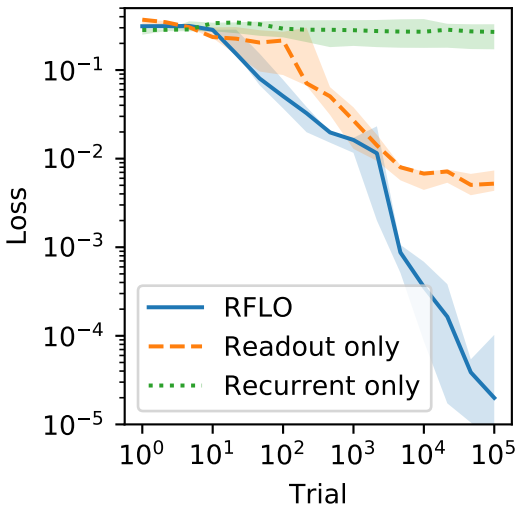

Supplement: supp [file elife-43299-supp-v1.zip]

**a**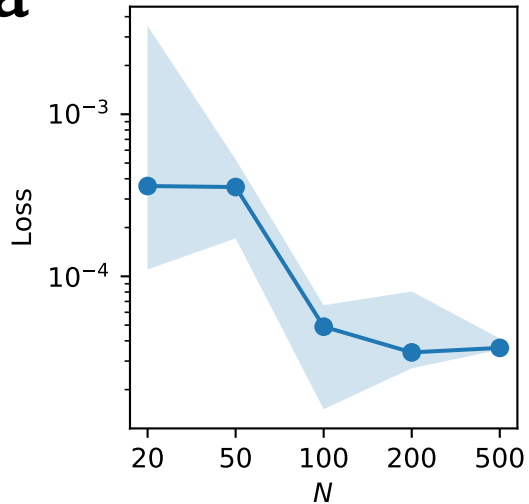**b**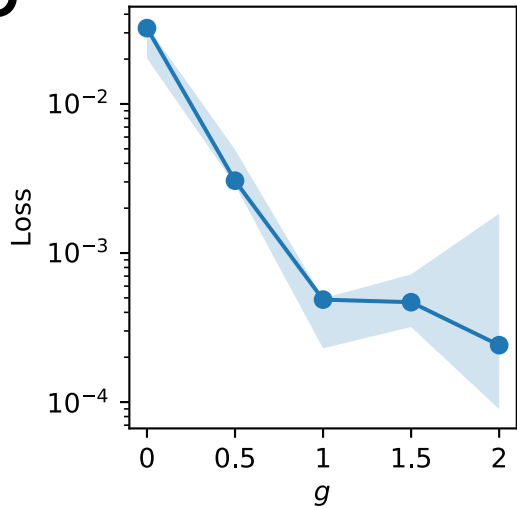

Supplement: supp [file elife-43299-supp-v1.zip]
